# Supplementary material for: A Pencil-Drawn Electronic Tongue for Environmental Applications
Source: MDPI journal article supplement (doi:10.3390/s21134471), 2021-06-29
Supplement: s1 [file s1]

# Supplementary Material

## A Pencil-Drawn Electronic Tongue for Environmental Applications

**Dmitry Kirsanov <sup>1,2,\*</sup>, Subhankar Mukherjee <sup>3</sup>, Souvik Pal <sup>3</sup>, Koustuv Ghosh <sup>3</sup>, Nabarun Bhattacharyya <sup>3</sup>, Rajib Bandyopadhyay <sup>4</sup>, Martin Jendrlin <sup>5</sup>, Aleksandar Radu <sup>5</sup>, Vladimir Zholobenko <sup>5</sup>, Monireh Dehabadi <sup>1</sup> and Andrey Legin <sup>1,2</sup>**

<sup>1</sup> Institute of Chemistry, Mendeleev Center, St. Petersburg State University, Universitetskaya nab. 7/9, St Petersburg 199034, Russia; dehabadi16752@gmail.com (M.D.); a.legin@spbu.ru (A.L.)

<sup>2</sup> ITMO University, St Petersburg 197101, Kronversky pr. 49, Russia

<sup>3</sup> Agri and Environmental Electronics (AEE) Group, Centre for Development of Advanced Computing (C-DAC), Sector—V, Salt Lake, Kolkata 700091, India; subhankar.mukherjee@cdac.in (S.M.); souvipal@gmail.com (S.P.); koustuv02@gmail.com (K.G.); nabarun.bhattacharya@cdac.in (N.B.)

<sup>4</sup> Department of Instrumentation & Electronics Engg, Jadavpur University, Salt Lake Campus, Block LB, Sector III, Kolkata 700098, West Bengal, India; rajib.bandyopadhyay@jadavpuruniversity.in

<sup>5</sup> Lennard-Jones Laboratories, Birchall Centre, Keele University, Keele, Staffordshire ST5 5BG, UK; m.jendrlin@keele.ac.uk (M.J.); a.radu@keele.ac.uk (A.R.); v.l.zholobenko@keele.ac.uk (V.L.Z.)

**Table S1.** An example of potentiometric responses of sensors ( $\pm 3$  mV/dec).

|          | NaX   | LTL   | ZSM5  | KX    | BEA19 | BEA12 | K4    | NaA   | Na4   | CLPT  | MOR1  | KA   |
|----------|-------|-------|-------|-------|-------|-------|-------|-------|-------|-------|-------|------|
| sample1  | 297.5 | 304.0 | 318.1 | 294.7 | 305.1 | 281.2 | 302.1 | 294.5 | 314.3 | 291.9 | 347.9 | 29.9 |
| sample2  | 300.1 | 305.8 | 318.6 | 292.1 | 305.5 | 279.8 | 302.9 | 292.4 | 312.7 | 290.2 | 350.6 | 50.0 |
| sample3  | 302.5 | 307.3 | 311.1 | 300.4 | 303.3 | 288.1 | 309.1 | 300.9 | 318.8 | 297.5 | 336.5 | 60.1 |
| sample4  | 306.1 | 310.2 | 313.4 | 302.8 | 307.1 | 289.9 | 309.9 | 302.6 | 317.9 | 290.8 | 337.6 | 56.7 |
| sample5  | 298.8 | 309.1 | 313.2 | 306.0 | 301.4 | 281.6 | 308.4 | 299.5 | 317.3 | 297.6 | 317.4 | 91.6 |
| sample6  | 302.3 | 310.0 | 312.6 | 304.9 | 305.9 | 287.6 | 311.6 | 301.8 | 320.8 | 298.9 | 327.7 | 49.5 |
| sample7  | 302.6 | 308.8 | 315.6 | 301.6 | 305.2 | 289.9 | 308.7 | 301.8 | 318.9 | 290.2 | 344.4 | 77.7 |
| sample8  | 306.9 | 306.4 | 312.0 | 298.7 | 305.9 | 286.9 | 305.5 | 304.8 | 316.2 | 288.8 | 347.4 | 33.7 |
| sample9  | 298.5 | 307.7 | 316.5 | 305.5 | 301.7 | 287.6 | 309.7 | 307.2 | 322.9 | 304.8 | 330.9 | 38.8 |
| sample10 | 301.4 | 314.0 | 315.5 | 304.6 | 303.6 | 288.7 | 312.6 | 303.8 | 323.4 | 304.3 | 333.4 | 94.1 |

**Table S2.** An example of reference data.

|          | Total Hardness | Total Alkalinity | SO4 = (ppm) | Cl (ppm) | Ca (ppm) | Mg (ppm) | Na (ppm) | K (ppm) | Cu (ppm) | Fe (ppm) |
|----------|----------------|------------------|-------------|----------|----------|----------|----------|---------|----------|----------|
| sample1  | 88,90          | 22,00            | 5,50        | 49,70    | 80,16    | 8,74     | 3,70     | 1,58    | 0,01     | 0,05     |
| sample2  | 106,41         | 23,00            | 5,00        | 21,70    | 48,09    | 58,32    | 3,74     | 1,55    | 0,01     | 0,06     |
| sample3  | 99,60          | 28,00            | 9,50        | 35,50    | 80,16    | 19,44    | 4,09     | 1,90    | 0,01     | 0,03     |
| sample4  | 65,00          | 25,00            | 10,00       | 35,50    | 42,68    | 23,32    | 4,04     | 2,02    | 0,01     | 0,06     |
| sample5  | 67,66          | 25,00            | 7,50        | 14,20    | 36,07    | 31,59    | 5,00     | 2,10    | 0,01     | 0,07     |
| sample6  | 68,15          | 26,00            | 16,00       | 28,40    | 49,69    | 18,46    | 5,04     | 1,99    | 0,01     | 0,05     |
| sample7  | 61,84          | 26,00            | 8,50        | 28,40    | 33,66    | 28,18    | 6,11     | 2,45    | 0,01     | 0,06     |
| sample8  | 67,18          | 30,00            | 8,20        | 35,50    | 49,69    | 17,49    | 5,94     | 2,52    | 0,01     | 0,05     |
| sample9  | 46,73          | 14,00            | 10,50       | 21,30    | 38,47    | 8,26     | 4,66     | 2,07    | 0,02     | 0,04     |
| sample10 | 48,22          | 23,00            | 4,00        | 14,20    | 36,07    | 12,15    | 4,95     | 2,08    | 0,02     | 0,02     |
